# Supplementary material for: Underground isoleucine biosynthesis pathways in E. coli
Source: eLife. 2020 Aug 24;9:e54207. doi: 10.7554/eLife.54207 (PMC7476758; doi:10.7554/eLife.54207)
Supplement: Figure 3—source data 1. [file elife-54207-fig3-data1.xlsx]

## Sheet: Fig. 3 - SD 1
Strain		WT				ΔilvA ΔtdcB				ΔilvA ΔtdcB ΔsdaA ΔsdaB ΔtdcG
Condition		glu 1C (1)	glu 1C (2)	glu 3C (1)	glu 3C (2)	glu 1C (1)	glu 1C (2)	glu 3C (1)	glu 3C (2)	glu 1C (1)	glu 1C (2)	glu 3C (1)	glu 3C (2)		red in these lines indicates the position of the label
															glu = 10 mM glucose
Isoleucine
retention time 1.82 - 1.85
Sample name		1	2	3	4	5	6	7	8	9	10	11	12
	m/z (kg/C)	Relative (%)	Relative (%)	Relative (%)	Relative (%)	Relative (%)	Relative (%)	Relative (%)	Relative (%)	Relative (%)	Relative (%)	Relative (%)	Relative (%)
0	132.103	53.63	54.24	100	100	51.48	50.61	100	100	55.96	56.39	100	100
1	133.106	100	100	69.76	66.68	100	100	51.43	49.46	100	100	52.4	53.04
2	134.109	62.66	63.21	21.41	20.85	63.64	69.67	13.56	12.23	66.52	65.69	14.5	14.9
3	135.113	12.84	12.77	2.06	2.24	13.21	18.35	1.69	1.4	18.07	17.32	2.1	2.13
	m/z (kg/C)
0	132.103	0.234059	0.235601	0.517518	0.526954	0.225463	0.212086	0.599952	0.613158	0.232634	0.235547	0.591716	0.587993
1	133.106	0.436433	0.434367	0.361021	0.351373	0.437963	0.419059	0.308555	0.303268	0.415714	0.417711	0.310059	0.311872
2	134.109	0.273469	0.274563	0.110801	0.10987	0.278719	0.291958	0.0813535	0.0749893	0.276533	0.274394	0.0857988	0.087611
3	135.113	0.0560381	0.0554687	0.0106609	0.0118038	0.0578549	0.0768973	0.0101392	0.00858422	0.0751195	0.0723475	0.012426	0.0125243
Threonine
retention time 0,61 - 0,64		1	2	3	4	5	6	7	8	9	10	11	12
	m/z (kg/C)	Relative (%)	Relative (%)	Relative (%)	Relative (%)	Relative (%)	Relative (%)	Relative (%)	Relative (%)	Relative (%)	Relative (%)	Relative (%)	Relative (%)
0	120.066	87.63	88.04	100	100	79.27	70.49	100	100	84.1	89.96	100	100
1	121.069	100	100	52.12	51.62	100	100	31.82	31.17	100	100	37.72	37.65
2	122.072	30.52	19.5	12.46	12.49	32.94	40.91	5.64	5.52	32.71	34.55	6.9	8.31
3	123.076	2.82	2.3	0.85	0.82	4.26	5.25	0.66	0.39	3.7	3.42	0.66	0.71
	m/z (kg/C)
0	120.066	0.39657	0.419558	0.604485	0.606318	0.366194	0.325363	0.724008	0.729501	0.381389	0.394683	0.688326	0.681803
1	121.069	0.45255	0.476554	0.315058	0.312981	0.461958	0.461574	0.230379	0.227385	0.453494	0.438731	0.259637	0.256699
2	122.072	0.138118	0.0929279	0.0753189	0.0757291	0.152169	0.18883	0.0408341	0.0402685	0.148338	0.151582	0.0474945	0.0566578
3	123.076	0.0127619	0.0109607	0.00513812	0.00497181	0.0196794	0.0242326	0.00477845	0.00284505	0.0167793	0.0150046	0.00454295	0.0048408
Alanine
retention time 0.59 - 0,64		1	2	3	4	5	6	7	8	9	10	11	12
	m/z (kg/C)	Relative (%)	Relative (%)	Relative (%)	Relative (%)	Relative (%)	Relative (%)	Relative (%)	Relative (%)	Relative (%)	Relative (%)	Relative (%)	Relative (%)
0	90.055	100	100	100	100	100	99.92	100	100	100	100	100	100
1	91.0584	82.25	81.25	72.41	72.67	87.11	100	58	62.17	88.63	86.85	53.64	63.72
2	92.065	5.33	5.46	4.71	4.82	8.76	11.66	4.19	3.77	11.37	11.08	4.42	4.58
3	93.0651	0.57	0.27	0.28	0.34	0.56	1.47	0.53	0.62	0.99	0.8	0.45	0.41
	m/z (kg/C)
0	120.066	0.531491	0.534817	0.563698	0.562335	0.509087	0.468998	0.614553	0.600384	0.497537	0.503195	0.630875	0.592733
1	121.069	0.437151	0.434538	0.408174	0.408649	0.443466	0.469373	0.356441	0.373259	0.440967	0.437025	0.338401	0.37769
2	122.072	0.0283285	0.029201	0.0265502	0.0271045	0.044596	0.0547289	0.0257498	0.0226345	0.05657	0.055754	0.0278847	0.0271472
3	123.076	0.0030295	0.001444	0.00157835	0.00191194	0.00285089	0.00689979	0.00325713	0.00372238	0.00492562	0.00402556	0.00283894	0.00243021
