# Supplementary material for: Underground isoleucine biosynthesis pathways in E. coli
Source: eLife. 2020 Aug 24;9:e54207. doi: 10.7554/eLife.54207 (PMC7476758; doi:10.7554/eLife.54207)
Supplement: Figure 6—source data 1. [file elife-54207-fig6-data1.xlsx]

## Sheet: Fig. 6 - SD 1
	Concentrations of methionine and O-succinyl-L-homoserine in WT, Δ5 (+isolecuine), Δ5 ΔmetC, and Δ5 cysE* strains as measured by HRES-LC-MS. Results were converted into absolute intracellular concentrations using known values for E. coli cell concentration per ml per OD unit and intracellular volume of E. coli. Below shown are the calibration curves for methionine and O-succinyl-L-homoserine conce…
									Methionine							Succinyl homo serine
		Strain	Condition	Quenching fluid	Culture	OD	Extraction fluid		retention time [min]	Peak area	extract concentration [µM]	intracellular conc (uM)				retention time [min]	Peak area	extract concentration [µM]	intracellular conc (uM)
1	WT	28/44	10 mM glucose	36ml	12ml	0.49	0.5ml		5.47	992149	0.288898	116.982	115.197			5.68	2885039	0.170659	69.1038	46.6159
2	WT	28/44	10 mM glucose			0.55			5.46	1070570	0.313608	113.134				5.67	2142944	0.112437	40.5615
3	WT	28/44	10 mM glucose			0.42			5.46	842997	0.2419	114.276				5.67	1802163	0.0857001	40.4857
4	WT	28/44	10 mM glucose			0.48			5.45	995182	0.289854	119.814				5.66	2011533	0.102127	42.215
5	WT	28/44	10 mM glucose			0.55			5.45	997840	0.290691	104.867				5.67	1970004	0.0988683	35.6668
6	WT	28/44	10 mM glucose			0.57			5.46	1188578	0.350793	122.108				5.67	2601543	0.148417	51.6627
7	D5 CysE	203/18	10 mM glucose			0.5			5.46	446927	0.117098	46.4676	43.183			5.67	42312706	3.26402	1295.25	1573.42
8	D5 CysE	203/18	10 mM glucose			0.5			5.46	368905	0.0925137	36.7118				5.67	55248016	4.27888	1697.97
9	D5 CysE	203/18	10 mM glucose			0.43			5.46	357109	0.0887968	40.973				5.67	49846751	3.85511	1778.85
10	D5 CysE	203/18	10 mM glucose			0.45			5.46	424967	0.110179	48.5797				5.67	44696217	3.45102	1521.61
11	D5 MetC	A/A 2	10 mM glucose #2			0.48			5.46	346494	0.085452	35.3224	30.9217			5.67	3971341	0.255886	105.773	131.823
12	D5 MetC	A/A 2	10 mM glucose #2			0.39			5.45	193411	0.0372155	18.9334				5.66	3378925	0.209407	106.536
13	D5 MetC	A/A 2	10 mM glucose #2			0.41			5.45	215952	0.0443182	21.447				5.66	3802412	0.242633	117.418
14	D5 MetC	A/A 2	10 mM glucose #2			0.49			5.45	142938	0.0213114	8.62951				5.67	4900983	0.328823	133.148
15	D5 MetC	A/A 2	10 mM glucose #1			0.54			5.46	232940	0.0496711	18.2507				5.66	5515922	0.377069	138.547
16	D5 MetC	A/A 2	10 mM glucose #1			0.53			5.46	476012	0.126263	47.2683				5.66	5713123	0.392541	146.953
17	D5 MetC	A/A 2	10 mM glucose #1			0.54			5.45	469579	0.124236	45.6482				5.66	5894370	0.406761	149.456
18	D5 MetC	A/A 2	10 mM glucose #1			0.58			5.45	556539	0.151637	51.8737				5.66	6550322	0.458224	156.754
19	D5	159/79	10 mM glucose + 2 mM iso			0.76			5.45	1771559	0.53449	139.539	139.778			5.67	2054770	0.105519	27.5477	27.5489
20	D5	159/79	10 mM glucose + 2 mM iso			0.85			5.45	1902856	0.575862	134.422				5.66	2291397	0.124084	28.9644
21	D5	159/79	10 mM glucose + 2 mM iso			0.88			5.45	2127769	0.646732	145.818				5.66	2193978	0.116441	26.2537
22	D5	159/79	10 mM glucose + 2 mM iso			0.84			5.45	1947329	0.589875	139.332				5.66	2189967	0.116126	27.4296
									Methionine							Succinyl homo serine
									retention time [min]	150.058	(m/z)					retention time [min]	220.081	(m/z)
										0							0
									5.49	1203764	0.355578					5.76	7234100
										0							0
								0.005	5.5	25314	-0.0157519					5.77	108402	-0.0471867		700000000	Cells/ml OD 1 culture
								0.01	5.49	69543	-0.00181535					5.77	321026	-0.0305049		3e-13	ml/cell
								0.025	5.5	171276	0.0302407					5.77	680515	-0.00230062
								0.1	5.5	334833	0.0817776					5.77	1483755	0.0607189		0.00021	ml per OD 1 culture
								0.25	5.5	898989	0.259543					5.77	3740337	0.237763
								0.5	5.5	1688334	0.508266					5.77	7166211	0.506545
								1	5.5	3233577	0.995172					5.77	13630147	1.01368
								2.5	5.5	7017285	2.18742					5.77	34285434	2.63423
								5	5.5	11531548	3.60986					5.77	63753746	4.94621
								10	5.49	18599862	5.83709					5.77	115056839	8.97128
								25	5.49	34823338	10.9491					5.76	228865231	17.9003
								50	5.49	54175873	17.0471					5.77	375506734	29.4053
								100	5.49	83332369	26.2343					5.76	622975110	48.8208
								slope		3.17359e+06							1.27459e+07
								intercept		75304.2							709839
								R2		0.999126							0.998838
