# Supplementary material for: Underground isoleucine biosynthesis pathways in E. coli
Source: eLife. 2020 Aug 24;9:e54207. doi: 10.7554/eLife.54207 (PMC7476758; doi:10.7554/eLife.54207)
Supplement: Figure 6—source data 2. [file elife-54207-fig6-data2.xlsx]

## Sheet: Sheet1
Transcript levels of metA and metB in the WT, Δ5 (+isolecuine), Δ5 ΔmetC, and Δ5 cysE* strains, as normalized to the 16S ribosomal RNA rrsA. Two different primers were used to quantify the transcript levels of metA; similarly, two different primers were used to quantify the transcript levels metB.
	Product	Sample	Well	Ct	Temperatur in °C	Product from sample x	Average of 3 technical replicates		metA1	ΔCt (metA1-rrsA)	ΔΔCt (normalized to WT)	2^-ΔΔCt	Sample	Average of 3 2^-ΔΔCt	Standard deviation of 3 2^-ΔΔCt
	rrsA	Δ5-1	A1	9.28382	81	rrsA-Δ5-1	9.06197		Δ5-1	13.7125	-1.43912	2.71155	Δ5	2.65429	0.156754
	rrsA	Δ5-1	A2	9.11473	81.5	rrsA-Δ5-2	9.01783		Δ5-2	13.843	-1.30857	2.47696	Δ5 cysE	7.78788	0.308926
	rrsA	Δ5-1	A3	8.78736	81.5	rrsA-Δ5-3	9.18244		Δ5-3	13.6794	-1.47216	2.77437	Δ5 ΔmetC	2.84323	0.661692
	rrsA	Δ5-2	A4	8.86979	81.8	rrsA-Δ5 cysE-1	8.60217		Δ5 cysE-1	12.2573	-2.89432	7.43493	WT	1.00571	0.133488
	rrsA	Δ5-2	A5	9.01304	81.8	rrsA-Δ5 cysE-2	8.44686		Δ5 cysE-2	12.1662	-2.98542	7.91959
	rrsA	Δ5-2	A6	9.17067	81.8	rrsA-Δ5 cysE-3	8.81169		Δ5 cysE-3	12.1499	-3.00164	8.00912
	rrsA	Δ5-3	A7	9.30083	82	rrsA-Δ5 ΔmetC-1	8.97894		Δ5 ΔmetC-1	13.4255	-1.72608	3.30828
	rrsA	Δ5-3	A8	9.25087	81.8	rrsA-Δ5 ΔmetC-2	11.4894		Δ5 ΔmetC-2	14.0911	-1.06053	2.0857
	rrsA	Δ5-3	A9	8.99561	82	rrsA-Δ5 ΔmetC-3	10.8337		Δ5 ΔmetC-3	13.5028	-1.6488	3.13572
	rrsA	Δ5 cysE-1	A10	9.03513	82	rrsA-WT-1	9.5193		WT-1	14.9427	-0.208882	1.15579
	rrsA	Δ5 cysE-1	A11	8.26085	82.3	rrsA-WT-2	8.98483		WT-1	15.3032	0.151597	0.900253
	rrsA	Δ5 cysE-1	A12	8.51053	82.3	rrsA-WT-3	9.61604		WT-1	15.2089	0.0572841	0.961072
	rrsA	Δ5 cysE-2	A13	8.39281	82	metA1-Δ5-1	22.7744		WT average	15.1516
	rrsA	Δ5 cysE-2	A14	8.39119	82.2	metA1-Δ5-2	22.8609
	rrsA	Δ5 cysE-2	A15	8.55659	82	metA1-Δ5-3	22.8619		metA2	ΔCt (metA2-rrsA)	ΔΔCt (normalized to WT)	2^-ΔΔCt	Sample	Average of 3 2^-ΔΔCt	Standard deviation of 3 2^-ΔΔCt
	rrsA	Δ5 cysE-3	A16	8.75241	82	metA1-Δ5 cysE-1	20.8594		Δ5-1	13.8921	-1.35978	2.56645	Δ5	2.72552	0.409333
	rrsA	Δ5 cysE-3	A17	8.94652	82	metA1-Δ5 cysE-2	20.613		Δ5-2	13.5781	-1.67378	3.1905	Δ5 cysE	8.58813	1.06158
	rrsA	Δ5 cysE-3	A18	8.73614	81.9	metA1-Δ5 cysE-3	20.9616		Δ5-3	13.9771	-1.27476	2.41959	Δ5 ΔmetC	2.62391	0.798389
	rrsA	Δ5 ΔmetC-1	A19	9.40951	81.6	metA1-Δ5 ΔmetC-1	22.4044		Δ5 cysE-1	12.0373	-3.21456	9.28282	WT	1.01538	0.207565
	rrsA	Δ5 ΔmetC-1	A20	8.67985	81.9	metA1-Δ5 ΔmetC-2	25.5804		Δ5 cysE-2	12.0636	-3.18831	9.11543
	rrsA	Δ5 ΔmetC-1	A21	8.84745	81.6	metA1-Δ5 ΔmetC-3	24.3365		Δ5 cysE-3	12.371	-2.88091	7.36614
	rrsA	Δ5 ΔmetC-2	A22	11.59	81.4	metA1-WT-1	24.462		Δ5 ΔmetC-1	13.4263	-1.82554	3.54439
	rrsA	Δ5 ΔmetC-2	A23	11.4294	81.6	metA1-WT-2	24.288		Δ5 ΔmetC-2	14.1091	-1.1428	2.20809
	rrsA	Δ5 ΔmetC-2	A24	11.4486	81.3	metA1-WT-3	24.8249		Δ5 ΔmetC-3	14.1683	-1.08357	2.11927
	metA-1	Δ5-1	B1	22.7075	80.7	metA2-Δ5-1	22.9541		WT-1	15.0326	-0.219246	1.16413
	metA-1	Δ5-1	B2	22.6823	81.3	metA2-Δ5-2	22.5959		WT-1	15.1094	-0.142439	1.10377
	metA-1	Δ5-1	B3	22.9335	81.3	metA2-Δ5-3	23.1595		WT-1	15.6136	0.361685	0.778255
	metA-1	Δ5-2	B4	22.6721	81.2	metA2-Δ5 cysE-1	20.6395		WT average	15.2519
	metA-1	Δ5-2	B5	23.1905	81.5	metA2-Δ5 cysE-2	20.5104
	metA-1	Δ5-2	B6	22.7199	81.5	metA2-Δ5 cysE-3	21.1826		metB1	ΔCt (metB1-rrsA)	ΔΔCt (normalized to WT)	2^-ΔΔCt	Sample	Average of 3 2^-ΔΔCt	Standard deviation of 3 2^-ΔΔCt
	metA-1	Δ5-3	B7	22.8288	81.5	metA2-Δ5 ΔmetC-1	22.4053		Δ5-1	14.0255	-0.544831	1.45885	Δ5	2.24024	0.796603
	metA-1	Δ5-3	B8	23.0534	81.5	metA2-Δ5 ΔmetC-2	25.5984		Δ5-2	13.4259	-1.14446	2.21064	Δ5 cysE	4.87989	0.300178
	metA-1	Δ5-3	B9	22.7034	81.7	metA2-Δ5 ΔmetC-3	25.002		Δ5-3	12.961	-1.60939	3.05123	Δ5 ΔmetC	2.19984	0.197018
	metA-1	Δ5 cysE-1	B10	21.212	81.7	metA2-WT-1	24.5519		Δ5 cysE-1	12.2921	-2.27832	4.85112	WT	1.01588	0.227981
	metA-1	Δ5 cysE-1	B11	20.7027	81.7	metA2-WT-2	24.0943		Δ5 cysE-2	12.3703	-2.20011	4.59513
	metA-1	Δ5 cysE-1	B12	20.6636	81.7	metA2-WT-3	25.2296		Δ5 cysE-3	12.1937	-2.37668	5.19342
	metA-1	Δ5 cysE-2	B13	20.6415	81.7	metB1-Δ5-1	23.0875		Δ5 ΔmetC-1	13.312	-1.25835	2.39222
	metA-1	Δ5 cysE-2	B14	20.5306	81.7	metB1-Δ5-2	22.4437		Δ5 ΔmetC-2	13.5715	-0.998912	1.99849
	metA-1	Δ5 cysE-2	B15	20.667	81.7	metB1-Δ5-3	22.1434		Δ5 ΔmetC-3	13.4271	-1.14327	2.20881
	metA-1	Δ5 cysE-3	B16	20.8732	81.4	metB1-Δ5 cysE-1	20.8942		WT-1	14.2163	-0.354093	1.27818
	metA-1	Δ5 cysE-3	B17	21.2424	81.7	metB1-Δ5 cysE-2	20.8171		WT-1	14.716	0.145609	0.903998
	metA-1	Δ5 cysE-3	B18	20.7693	81.7	metB1-Δ5 cysE-3	21.0054		WT-1	14.7789	0.208484	0.865446
	metA-1	Δ5 ΔmetC-1	B19	22.0049	81.4	metB1-Δ5 ΔmetC-1	22.291		WT average	14.5704
	metA-1	Δ5 ΔmetC-1	B20	22.5525	81.4	metB1-Δ5 ΔmetC-2	25.0608
	metA-1	Δ5 ΔmetC-1	B21	22.656	81.1	metB1-Δ5 ΔmetC-3	24.2608		metB1	ΔCt (metB2-rrsA)	ΔΔCt (normalized to WT)	2^-ΔΔCt	Sample	Average of 3 2^-ΔΔCt	Standard deviation of 3 2^-ΔΔCt
	metA-1	Δ5 ΔmetC-2	B22	24.6604	81.1	metB1-WT-1	23.7356		Δ5-1	13.5448	-0.762471	1.69639	Δ5	1.71392	0.117955
	metA-1	Δ5 ΔmetC-2	B23	27.1664	80.5	metB1-WT-2	23.7008		Δ5-2	13.624	-0.683213	1.60571	Δ5 cysE	4.81217	0.691456
	metA-1	Δ5 ΔmetC-2	B24	24.9144	81.1	metB1-WT-3	24.3949		Δ5-3	13.4278	-0.87944	1.83966	Δ5 ΔmetC	1.89643	0.376137
	metA-2	Δ5-1	C1	23.2186	81	metB2-Δ5-1	22.6067		Δ5 cysE-1	11.8359	-2.4713	5.54545	WT	1.00073	0.0468534
	metA-2	Δ5-1	C2	22.8511	81.3	metB2-Δ5-2	22.6418		Δ5 cysE-2	12.2465	-2.06073	4.17197
	metA-2	Δ5-1	C3	22.7924	81.5	metB2-Δ5-3	22.6102		Δ5 cysE-3	12.0687	-2.23851	4.7191
	metA-2	Δ5-2	C4	22.5291	81.5	metB2-Δ5 cysE-1	20.4381		Δ5 ΔmetC-1	13.0964	-1.21083	2.3147
	metA-2	Δ5-2	C5	22.7563	81.5	metB2-Δ5 cysE-2	20.6934		Δ5 ΔmetC-2	13.6419	-0.665366	1.58597
	metA-2	Δ5-2	C6	22.5023	81.5	metB2-Δ5 cysE-3	20.8804		Δ5 ΔmetC-3	13.4684	-0.838853	1.78863
	metA-2	Δ5-3	C7	23.1668	81.5	metB2-Δ5 ΔmetC-1	22.0753		WT-1	14.2377	-0.0695506	1.04939
	metA-2	Δ5-3	C8	23.4445	81.8	metB2-Δ5 ΔmetC-2	25.1312		WT-1	14.3723	0.0650371	0.955921
	metA-2	Δ5-3	C9	22.8673	81.7	metB2-Δ5 ΔmetC-3	24.302		WT-1	14.3117	0.00451344	0.996876
	metA-2	Δ5 cysE-1	C10	20.6346	81.7	metB2-WT-1	23.757		WT average	14.3072
	metA-2	Δ5 cysE-1	C11	20.82	82	metB2-WT-2	23.3571
	metA-2	Δ5 cysE-1	C12	20.4639	62.4	metB2-WT-3	23.9278
	metA-2	Δ5 cysE-2	C13	20.3332	81.7
	metA-2	Δ5 cysE-2	C14	20.5691	81.7	genomic DNA samples (red)			Uncorrected			Corrected * (see below)
	metA-2	Δ5 cysE-2	C15	20.629	81.7	no cDNA (-RT) products from sample x	Average of 3 technical replicates	corrected CT* (measured Ct + Cts to early)	ΔCt (+RT/-RT)	fold difference between +RT and -RT	% of signal from gDNA	ΔCt (+RT/-RT)	fold difference between +RT and -RT	% of signal from gDNA
	metA-2	Δ5 cysE-3	C16	21.6533	81.7	rrsA-Δ5-1	23.2766	26.3816	14.2147	19012.4	0.00525972	17.3197	163583	0.000611311
	metA-2	Δ5 cysE-3	C17	21.0752	81.7	rrsA-Δ5-2	24.4394	27.2834	15.4216	43889.4	0.00227845	18.2656	315126	0.000317333
	metA-2	Δ5 cysE-3	C18	20.8195	81.7	rrsA-Δ5-3	24.5752	26.7718	15.3928	43021.2	0.00232443	17.5894	197209	0.000507075
	metA-2	Δ5 ΔmetC-1	C19	22.3543	81.4	rrsA-Δ5 cysE-1	24.287	27.7663	15.6849	52676.5	0.00189838	19.1641	587449	0.000170228
	metA-2	Δ5 ΔmetC-1	C20	22.3076	81.4	rrsA-Δ5 cysE-2	24.5095	28.4491	16.0627	68445.4	0.00146102	20.0023	1.05023e+06	9.52176e-05
	metA-2	Δ5 ΔmetC-1	C21	22.5539	81.4	rrsA-Δ5 cysE-3	23.3698	27.5191	14.5581	24123.3	0.00414537	18.7074	428043	0.000233621
	metA-2	Δ5 ΔmetC-2	C22	25.2941	81.1	rrsA-Δ5 ΔmetC-1	23.5868	26.0451	14.6078	24968.6	0.00400503	17.0662	137227	0.000728718
	metA-2	Δ5 ΔmetC-2	C23	25.6212	81.1	rrsA-Δ5 ΔmetC-2	25.7059	26.6105	14.2166	19037.8	0.00525272	15.1212	35638.7	0.00280594
	metA-2	Δ5 ΔmetC-2	C24	25.88	81.1	rrsA-Δ5 ΔmetC-3	24.9825	27.0335	14.1488	18164.6	0.00550521	16.1999	75274.2	0.00132848
	metB-1	Δ5-1	D1	23.392	84	rrsA-WT-1	24.6044	27.9083	15.0851	34759.3	0.00287693	18.389	343282	0.000291305
	metB-1	Δ5-1	D2	22.6941	84.8	rrsA-WT-2	23.4462	27.5582	14.4613	22558	0.00443303	18.5734	390072	0.000256363
	metB-1	Δ5-1	D3	23.1764	84.8	rrsA-WT-3	23.2755	28.0041	13.6595	12939.3	0.00772841	18.388	343046	0.000291506
	metB-1	Δ5-2	D4	22.303	84.8	metA1-Δ5-1	24.7634	27.8685	1.989	3.96962	25.1914	5.09401	34.1546	2.92787
	metB-1	Δ5-2	D5	22.61	84.8	metA1-Δ5-2	25.6156	28.4596	2.75477	6.74943	14.8161	5.59875	48.4609	2.06352
	metB-1	Δ5-2	D6	22.4182	84.8	metA1-Δ5-3	25.5787	27.7753	2.71685	6.57438	15.2106	4.91346	30.137	3.31818
	metB-1	Δ5-3	D7	22.3164	85	metA1-Δ5 cysE-1	25.6731	29.1523	4.81367	28.1229	3.55582	8.2929	313.627	0.31885
	metB-1	Δ5-3	D8	22.7551	85	metA1-Δ5 cysE-2	25.642	29.5816	5.02892	32.6479	3.06298	8.96852	500.95	0.199621
	metB-1	Δ5-3	D9	21.3588	85	metA1-Δ5 cysE-3	24.7973	28.9466	3.83569	14.2776	7.00396	7.98494	253.342	0.394723
	metB-1	Δ5 cysE-1	D10	20.969	85.3	metA1-Δ5 ΔmetC-1	24.6039	27.0623	2.19948	4.59313	21.7717	4.65786	25.2438	3.96136
	metB-1	Δ5 cysE-1	D11	20.8879	85.3	metA1-Δ5 ΔmetC-2	26.7793	27.6839	1.19888	2.29561	43.5614	2.10346	4.29739	23.27
	metB-1	Δ5 cysE-1	D12	20.8258	85.3	metA1-Δ5 ΔmetC-3	25.8404	27.8914	1.50396	2.83619	35.2585	3.55498	11.7532	8.50833
	metB-1	Δ5 cysE-2	D13	20.8589	85	metA1-WT-1	25.8151	29.119	1.35304	2.5545	39.1467	4.65697	25.2282	3.96382
	metB-1	Δ5 cysE-2	D14	20.6422	85.3	metA1-WT-2	25.2623	29.3744	0.974298	1.96469	50.8987	5.08633	33.9733	2.94348
	metB-1	Δ5 cysE-2	D15	20.9503	85	metA1-WT-3	24.7282	29.4568	-0.0967193	0.935157	106.934	4.63185	24.7929	4.03342
	metB-1	Δ5 cysE-3	D16	21.0347	85	metA2-Δ5-1	24.4006	27.5056	1.44657	2.72559	36.6893	4.55157	23.451	4.26422
	metB-1	Δ5 cysE-3	D17	21.2347	84.9	metA2-Δ5-2	25.7843	28.6282	3.18835	9.11568	10.9701	6.03233	65.4506	1.52787
	metB-1	Δ5 cysE-3	D18	20.7467	84.9	metA2-Δ5-3	26.0827	28.2793	2.92311	7.58478	13.1843	5.11971	34.7686	2.87616
	metB-1	Δ5 ΔmetC-1	D19	21.8951	84.6	metA2-Δ5 cysE-1	26.261	29.7402	5.62153	49.2323	2.03118	9.10077	549.039	0.182136
	metB-1	Δ5 ΔmetC-1	D20	23.0273	84.6	metA2-Δ5 cysE-2	24.9189	28.8585	4.40849	21.2367	4.70884	8.34809	325.856	0.306884
	metB-1	Δ5 ΔmetC-1	D21	21.9504	84.6	metA2-Δ5 cysE-3	24.823	28.9723	3.64037	12.4698	8.01936	7.78963	221.265	0.451948
	metB-1	Δ5 ΔmetC-2	D22	24.9944	84.4	metA2-Δ5 ΔmetC-1	24.9555	27.4139	2.55022	5.85722	17.073	5.0086	32.1913	3.10643
	metB-1	Δ5 ΔmetC-2	D23	24.9698	84.4	metA2-Δ5 ΔmetC-2	26.9019	27.8065	1.30347	2.46822	40.515	2.20805	4.62051	21.6426
	metB-1	Δ5 ΔmetC-2	D24	25.2183	84.3	metA2-Δ5 ΔmetC-3	25.7269	27.778	0.724989	1.65289	60.5002	2.77601	6.84957	14.5995
	metB-2	Δ5-1	E1	22.9564	83.7	metA2-WT-1	25.9544	29.2583	1.40244	2.64348	37.829	4.70636	26.107	3.8304
	metB-2	Δ5-1	E2	22.5678	84	metA2-WT-2	25.0573	29.1693	0.963051	1.94943	51.2971	5.07508	33.7095	2.96652
	metB-2	Δ5-1	E3	22.2961	84.2	metA2-WT-3	24.6762	29.4048	-0.553413	0.681406	146.755	4.17516	18.0654	5.53543
	metB-2	Δ5-2	E4	22.4287	84.2	metB1-Δ5-1	23.9276	27.0326	0.840128	1.79021	55.8594	3.94514	15.403	6.49226
	metB-2	Δ5-2	E5	23.7718	61.9	metB1-Δ5-2	25.4102	28.2542	2.96645	7.81612	12.7941	5.81044	56.1197	1.7819
	metB-2	Δ5-2	E6	21.7249	84.2	metB1-Δ5-3	25.8187	28.0153	3.67525	12.775	7.82781	5.87185	58.5604	1.70764
	metB-2	Δ5-3	E7	22.6961	84.5	metB1-Δ5 cysE-1	25.6263	29.1055	4.73209	26.5766	3.76271	8.21132	296.382	0.337402
	metB-2	Δ5-3	E8	22.6432	84.2	metB1-Δ5 cysE-2	25.9695	29.9091	5.15235	35.5642	2.81182	9.09196	545.697	0.183252
	metB-2	Δ5-3	E9	22.4914	84.5	metB1-Δ5 cysE-3	24.5671	28.7163	3.5617	11.8081	8.46877	7.71096	209.523	0.477275
	metB-2	Δ5 cysE-1	E10	20.4924	84.5	metB1-Δ5 ΔmetC-1	24.8766	27.335	2.58562	6.00272	16.6591	5.044	32.9909	3.03114
	metB-2	Δ5 cysE-1	E11	20.5915	84.5	metB1-Δ5 ΔmetC-2	27.0691	27.9737	2.00831	4.02309	24.8565	2.91289	7.53123	13.278
	metB-2	Δ5 cysE-1	E12	20.2303	84.5	metB1-Δ5 ΔmetC-3	25.9943	28.0453	1.73356	3.32547	30.0709	3.78458	13.7808	7.25649
	metB-2	Δ5 cysE-2	E13	20.7697	84.1	metB1-WT-1	25.6129	28.9168	1.87728	3.67383	27.2196	5.18121	36.2827	2.75613
	metB-2	Δ5 cysE-2	E14	20.855	84.4	metB1-WT-2	25.0171	29.1291	1.3163	2.49027	40.1563	5.42833	43.0617	2.32225
	metB-2	Δ5 cysE-2	E15	20.4554	84.7	metB1-WT-3	24.7174	29.446	0.322536	1.25053	79.9663	5.05111	33.154	3.01623
	metB-2	Δ5 cysE-3	E16	21.0985	84.4	metB2-Δ5-1	24.3416	27.4466	1.73489	3.32855	30.0431	4.8399	28.6389	3.49176
	metB-2	Δ5 cysE-3	E17	20.8644	84.1	metB2-Δ5-2	25.5752	28.4192	2.93338	7.639	13.0907	5.77737	54.8481	1.82322
	metB-2	Δ5 cysE-3	E18	20.6783	84.7	metB2-Δ5-3	25.1408	27.3374	2.53057	5.778	17.307	4.72718	26.4863	3.77553
	metB-2	Δ5 ΔmetC-1	E19	22.4115	84.1	metB2-Δ5 cysE-1	25.4792	28.9584	5.04107	32.924	3.0373	8.5203	367.169	0.272354
	metB-2	Δ5 ΔmetC-1	E20	22.0863	84.1	metB2-Δ5 cysE-2	25.4131	29.3527	4.71976	26.3504	3.795	8.65936	404.321	0.247328
	metB-2	Δ5 ΔmetC-1	E21	21.7282	84.1	metB2-Δ5 cysE-3	24.367	28.5163	3.48662	11.2092	8.92121	7.63588	198.897	0.502773
	metB-2	Δ5 ΔmetC-2	E22	25.055	83.8	metB2-Δ5 ΔmetC-1	24.6523	27.1107	2.57698	5.96691	16.7591	5.03537	32.7941	3.04933
	metB-2	Δ5 ΔmetC-2	E23	25.2199	83.8	metB2-Δ5 ΔmetC-2	26.7133	27.6179	1.58209	2.99402	33.3999	2.48667	5.60481	17.8418
	metB-2	Δ5 ΔmetC-2	E24	25.1187	84.1	metB2-Δ5 ΔmetC-3	25.6293	27.6803	1.32722	2.5092	39.8534	3.37825	10.3981	9.61714
	rrsA	Δ5 ΔmetC-3	F1	10.8618	81.5	metB2-WT-1	25.1192	28.4231	1.36221	2.57078	38.8987	4.66613	25.389	3.93871
	rrsA	Δ5 ΔmetC-3	F2	10.9338	81.8	metB2-WT-2	24.4826	28.5946	1.12549	2.18175	45.8348	5.23752	37.7268	2.65063
	rrsA	Δ5 ΔmetC-3	F3	10.7054	81.8	metB2-WT-3	23.7696	28.4982	-0.158187	0.896151	111.588	4.57039	23.7587	4.20898
	rrsA	WT-1	F4	9.41458	82.1
	rrsA	WT-1	F5	9.67075	82.1	* Ct correction for -RT samples			cDNA synthesis: 500 ng in 20 µl = 25 ng/µl
	rrsA	WT-1	F6	9.47258	82.1	-RT samples require correction due to higher dilution compared to +RT samples
	rrsA	WT-2	F7	8.83382	82	Sample	RNA concentration in ng/µl	x-times higher concentration compared to +RT sample	Calculated Ct difference to be added (for -RT samples)
	rrsA	WT-2	F8	9.25105	82.3	rrsA-Δ5-1	215.1	8.604	3.10501
	rrsA	WT-2	F9	8.86963	82.3	rrsA-Δ5-2	179.5	7.18	2.84398
	rrsA	WT-3	F10	9.7395	82.6	rrsA-Δ5-3	114.6	4.584	2.19661
	rrsA	WT-3	F11	9.65235	82.6	rrsA-Δ5 cysE-1	278.8	11.152	3.47923
	rrsA	WT-3	F12	9.45627	82.5	rrsA-Δ5 cysE-2	383.6	15.344	3.9396
no cDNA (-RT samples)	rrsA	Δ5-1	F13	23.1738	82	rrsA-Δ5 cysE-3	443.6	17.744	4.14926
	rrsA	Δ5-1	F14	23.33	82.5	rrsA-Δ5 ΔmetC-1	137.4	5.496	2.45838
	rrsA	Δ5-1	F15	23.326	82.2	rrsA-Δ5 ΔmetC-2	46.8	1.872	0.90458
	rrsA	Δ5-2	F16	24.8241	82	rrsA-Δ5 ΔmetC-3	103.6	4.144	2.05102
	rrsA	Δ5-2	F17	24.1878	82	rrsA-WT-1	246.9	9.876	3.30393
	rrsA	Δ5-2	F18	24.3064	81.9	rrsA-WT-2	432.3	17.292	4.11203
	rrsA	Δ5-3	F19	24.4542	81.6	rrsA-WT-3	662.8	26.512	4.72857
	rrsA	Δ5-3	F20	24.7879	81.6
	rrsA	Δ5-3	F21	24.4835	81.6
	rrsA	Δ5 cysE-1	F22	24.2941	81.4	Water controls
	rrsA	Δ5 cysE-1	F23	24.221	81.4	rrsA-H2O	32.7036
	rrsA	Δ5 cysE-1	F24	24.346	81.6	metA1-H2O	30.7043
	metA-1	Δ5 ΔmetC-3	G1	24.3327	81	metA2-H2O	31.12
	metA-1	Δ5 ΔmetC-3	G2	24.2989	81.5	metB1-H2O	31.1878
	metA-1	Δ5 ΔmetC-3	G3	24.3777	81.8	metB2-H2O	33.5556
	metA-1	WT-1	G4	24.5963	81.8
	metA-1	WT-1	G5	24.2796	81.5
	metA-1	WT-1	G6	24.5101	81.8
	metA-1	WT-2	G7	24.2545	81.8
	metA-1	WT-2	G8	24.2295	82
	metA-1	WT-2	G9	24.3801	82
	metA-1	WT-3	G10	25.2868	82
	metA-1	WT-3	G11	24.6044	82.3
	metA-1	WT-3	G12	24.5836	82.3
no cDNA (-RT samples)	metA-1	Δ5-1	G13	24.7042	82
	metA-1	Δ5-1	G14	24.9215	82
	metA-1	Δ5-1	G15	24.6647	82
	metA-1	Δ5-2	G16	25.5705	81.7
	metA-1	Δ5-2	G17	25.6184	82
	metA-1	Δ5-2	G18	25.658	81.7
	metA-1	Δ5-3	G19	25.7415	81.6
	metA-1	Δ5-3	G20	25.2108	81.6
	metA-1	Δ5-3	G21	25.7839	81.4
	metA-1	Δ5 cysE-1	G22	25.6566	81.4
	metA-1	Δ5 cysE-1	G23	25.9776	81.4
	metA-1	Δ5 cysE-1	G24	25.3851	81.1
	metA-2	Δ5 ΔmetC-3	H1	24.7168	81
	metA-2	Δ5 ΔmetC-3	H2	24.9253	81.5
	metA-2	Δ5 ΔmetC-3	H3	25.3638	81.3
	metA-2	WT-1	H4	24.7655	81.5
	metA-2	WT-1	H5	24.2797	81.5
	metA-2	WT-1	H6	24.6106	81.8
	metA-2	WT-2	H7	24.1218	82
	metA-2	WT-2	H8	23.7526	81.8
	metA-2	WT-2	H9	24.4084	82
	metA-2	WT-3	H10	24.912	82
	metA-2	WT-3	H11	25.4557	82.3
	metA-2	WT-3	H12	25.3211	82.3
no cDNA (-RT samples)	metA-2	Δ5-1	H13	24.0881	82
	metA-2	Δ5-1	H14	24.67	82
	metA-2	Δ5-1	H15	24.4438	82
	metA-2	Δ5-2	H16	25.8811	81.7
	metA-2	Δ5-2	H17	25.9761	82
	metA-2	Δ5-2	H18	25.4956	81.9
	metA-2	Δ5-3	H19	25.4718	81.6
	metA-2	Δ5-3	H20	26.5047	81.4
	metA-2	Δ5-3	H21	26.2714	81.6
	metA-2	Δ5 cysE-1	H22	26.2189	81.4
	metA-2	Δ5 cysE-1	H23	26.6994	81.4
	metA-2	Δ5 cysE-1	H24	25.8647	81.3
	metB-1	Δ5 ΔmetC-3	I1	24.6182	84
	metB-1	Δ5 ΔmetC-3	I2	24.3761	84.8
	metB-1	Δ5 ΔmetC-3	I3	23.788	84.8
	metB-1	WT-1	I4	23.5002	85.1
	metB-1	WT-1	I5	23.8785	84.8
	metB-1	WT-1	I6	23.8279	85.1
	metB-1	WT-2	I7	23.983	85
	metB-1	WT-2	I8	23.3389	85
	metB-1	WT-2	I9	23.7805	85.3
	metB-1	WT-3	I10	24.4222	85.3
	metB-1	WT-3	I11	24.3723	85.3
	metB-1	WT-3	I12	24.3901	85.3
no cDNA (-RT samples)	metB-1	Δ5-1	I13	23.7041	85.3
	metB-1	Δ5-1	I14	23.4717	85.5
	metB-1	Δ5-1	I15	24.6071	85.3
	metB-1	Δ5-2	I16	24.5761	85
	metB-1	Δ5-2	I17	25.7275	85.2
	metB-1	Δ5-2	I18	25.9269	84.9
	metB-1	Δ5-3	I19	25.9875	84.9
	metB-1	Δ5-3	I20	24.9489	84.9
	metB-1	Δ5-3	I21	26.5197	84.9
	metB-1	Δ5 cysE-1	I22	25.6791	84.6
	metB-1	Δ5 cysE-1	I23	25.7573	84.6
	metB-1	Δ5 cysE-1	I24	25.4426	84.3
	metB-2	Δ5 ΔmetC-3	J1	24.5296	83.7
	metB-2	Δ5 ΔmetC-3	J2	24.1575	84
	metB-2	Δ5 ΔmetC-3	J3	24.219	84.2
	metB-2	WT-1	J4	23.5431	84.2
	metB-2	WT-1	J5	23.6643	83.9
	metB-2	WT-1	J6	24.0636	84.5
	metB-2	WT-2	J7	23.7531	84.2
	metB-2	WT-2	J8	23.1059	84.5
	metB-2	WT-2	J9	23.2123	84.7
	metB-2	WT-3	J10	23.7007	84.5
	metB-2	WT-3	J11	23.9135	84.7
	metB-2	WT-3	J12	24.1691	85
no cDNA (-RT samples)	metB-2	Δ5-1	J13	23.9685	84.7
	metB-2	Δ5-1	J14	23.8204	84.4
	metB-2	Δ5-1	J15	25.236	85.3
	metB-2	Δ5-2	J16	25.5372	84.1
	metB-2	Δ5-2	J17	25.7683	84.1
	metB-2	Δ5-2	J18	25.4201	84.7
	metB-2	Δ5-3	J19	24.9753	84.4
	metB-2	Δ5-3	J20	25.3933	83.8
	metB-2	Δ5-3	J21	25.0538	84.4
	metB-2	Δ5 cysE-1	J22	24.8954	84.1
	metB-2	Δ5 cysE-1	J23	25.7789	83.8
	metB-2	Δ5 cysE-1	J24	25.7631	84.1
	rrsA	Δ5 cysE-2	K1	24.6539	81.3
	rrsA	Δ5 cysE-2	K2	24.3835	81.8
	rrsA	Δ5 cysE-2	K3	24.4913	82.1
	rrsA	Δ5 cysE-3	K4	23.4089	82.1
	rrsA	Δ5 cysE-3	K5	23.4729	82.1
	rrsA	Δ5 cysE-3	K6	23.2277	82.1
	rrsA	Δ5 ΔmetC-1	K7	23.7428	82.3
	rrsA	Δ5 ΔmetC-1	K8	23.4297	82.3
	rrsA	Δ5 ΔmetC-1	K9	23.5878	82.3
	rrsA	Δ5 ΔmetC-2	K10	25.9903	82
	rrsA	Δ5 ΔmetC-2	K11	25.3932	82.6
	rrsA	Δ5 ΔmetC-2	K12	25.7342	82.3
	rrsA	Δ5 ΔmetC-3	K13	24.6818	82.2
	rrsA	Δ5 ΔmetC-3	K14	25.1572	82.2
	rrsA	Δ5 ΔmetC-3	K15	25.1085	82.2
	rrsA	WT-1	K16	24.6637	82.2
	rrsA	WT-1	K17	24.529	82.2
	rrsA	WT-1	K18	24.6206	82.2
	rrsA	WT-2	K19	23.6086	82.2
	rrsA	WT-2	K20	23.4792	81.9
	rrsA	WT-2	K21	23.2508	81.6
	rrsA	WT-3	K22	23.2249	81.6
	rrsA	WT-3	K23	23.3753	81.9
	rrsA	WT-3	K24	23.2264	81.6
	metA-1	Δ5 cysE-2	L1	25.4924	80.7
	metA-1	Δ5 cysE-2	L2	25.4992	81.5
	metA-1	Δ5 cysE-2	L3	25.9342	81.5
	metA-1	Δ5 cysE-3	L4	24.5265	81.5
	metA-1	Δ5 cysE-3	L5	24.6834	81.5
	metA-1	Δ5 cysE-3	L6	25.182	81.8
	metA-1	Δ5 ΔmetC-1	L7	24.364	81.8
	metA-1	Δ5 ΔmetC-1	L8	24.6785	81.8
	metA-1	Δ5 ΔmetC-1	L9	24.7692	82
	metA-1	Δ5 ΔmetC-2	L10	26.0707	82
	metA-1	Δ5 ΔmetC-2	L11	26.6271	82
	metA-1	Δ5 ΔmetC-2	L12	27.6401	82
	metA-1	Δ5 ΔmetC-3	L13	25.5505	82
	metA-1	Δ5 ΔmetC-3	L14	25.7869	82
	metA-1	Δ5 ΔmetC-3	L15	26.1838	82
	metA-1	WT-1	L16	25.8544	82
	metA-1	WT-1	L17	25.8123	81.7
	metA-1	WT-1	L18	25.7785	81.7
	metA-1	WT-2	L19	25.3865	81.6
	metA-1	WT-2	L20	24.7728	81.6
	metA-1	WT-2	L21	25.6276	81.6
	metA-1	WT-3	L22	24.7489	81.1
	metA-1	WT-3	L23	24.5452	81.4
	metA-1	WT-3	L24	24.8905	81.3
	metA-2	Δ5 cysE-2	M1	23.7359	80.7
	metA-2	Δ5 cysE-2	M2	24.9771	81.3
	metA-2	Δ5 cysE-2	M3	26.0437	81.5
	metA-2	Δ5 cysE-3	M4	25.2308	81.5
	metA-2	Δ5 cysE-3	M5	24.7881	81.5
	metA-2	Δ5 cysE-3	M6	24.4502	81.5
	metA-2	Δ5 ΔmetC-1	M7	24.752	81.8
	metA-2	Δ5 ΔmetC-1	M8	25.1897	81.8
	metA-2	Δ5 ΔmetC-1	M9	24.9247	81.7
	metA-2	Δ5 ΔmetC-2	M10	27.7623	82
	metA-2	Δ5 ΔmetC-2	M11	26.3005	82
	metA-2	Δ5 ΔmetC-2	M12	26.6429	82
	metA-2	Δ5 ΔmetC-3	M13	25.6234	81.7
	metA-2	Δ5 ΔmetC-3	M14	25.6875	82
	metA-2	Δ5 ΔmetC-3	M15	25.8699	82
	metA-2	WT-1	M16	25.8533	81.7
	metA-2	WT-1	M17	25.642	82
	metA-2	WT-1	M18	26.3678	81.9
	metA-2	WT-2	M19	25.066	81.6
	metA-2	WT-2	M20	24.7241	81.6
	metA-2	WT-2	M21	25.3818	81.4
	metA-2	WT-3	M22	24.8359	81.4
	metA-2	WT-3	M23	24.5655	81.4
	metA-2	WT-3	M24	24.6271	81.3
	metB-1	Δ5 cysE-2	N1	25.9071	84
	metB-1	Δ5 cysE-2	N2	25.7727	84.5
	metB-1	Δ5 cysE-2	N3	26.2287	84.5
	metB-1	Δ5 cysE-3	N4	24.8044	84.8
	metB-1	Δ5 cysE-3	N5	24.7239	84.8
	metB-1	Δ5 cysE-3	N6	24.173	84.8
	metB-1	Δ5 ΔmetC-1	N7	24.7639	84.8
	metB-1	Δ5 ΔmetC-1	N8	24.7354	85
	metB-1	Δ5 ΔmetC-1	N9	25.1304	84.7
	metB-1	Δ5 ΔmetC-2	N10	26.2378	85
	metB-1	Δ5 ΔmetC-2	N11	27.8634	85.3
	metB-1	Δ5 ΔmetC-2	N12	27.1061	85.3
	metB-1	Δ5 ΔmetC-3	N13	25.9229	85
	metB-1	Δ5 ΔmetC-3	N14	26.198	85
	metB-1	Δ5 ΔmetC-3	N15	25.8621	85
	metB-1	WT-1	N16	25.96	84.7
	metB-1	WT-1	N17	25.5237	84.9
	metB-1	WT-1	N18	25.3549	84.9
	metB-1	WT-2	N19	24.7515	84.9
	metB-1	WT-2	N20	25.2167	84.6
	metB-1	WT-2	N21	25.0832	84.9
	metB-1	WT-3	N22	24.8167	84.6
	metB-1	WT-3	N23	24.8297	84.6
	metB-1	WT-3	N24	24.506	84.3
	metB-2	Δ5 cysE-2	O1	24.6201	83.4
	metB-2	Δ5 cysE-2	O2	25.5194	83.7
	metB-2	Δ5 cysE-2	O3	26.0999	84.2
	metB-2	Δ5 cysE-3	O4	24.7009	84
	metB-2	Δ5 cysE-3	O5	23.917	83.9
	metB-2	Δ5 cysE-3	O6	24.4832	84.8
	metB-2	Δ5 ΔmetC-1	O7	24.6888	84.2
	metB-2	Δ5 ΔmetC-1	O8	24.6279	84.2
	metB-2	Δ5 ΔmetC-1	O9	24.6402	84.5
	metB-2	Δ5 ΔmetC-2	O10	26.5307	84.2
	metB-2	Δ5 ΔmetC-2	O11	26.4648	84.5
	metB-2	Δ5 ΔmetC-2	O12	27.1444	84.5
	metB-2	Δ5 ΔmetC-3	O13	26.8644	84.1
	metB-2	Δ5 ΔmetC-3	O14	24.9273	84.4
	metB-2	Δ5 ΔmetC-3	O15	25.0961	85
	metB-2	WT-1	O16	25.3786	84.1
	metB-2	WT-1	O17	24.8736	84.1
	metB-2	WT-1	O18	25.1053	84.4
	metB-2	WT-2	O19	24.563	84.1
	metB-2	WT-2	O20	24.4794	84.1
	metB-2	WT-2	O21	24.4054	84.4
	metB-2	WT-3	O22	24.0752	83.5
	metB-2	WT-3	O23	24.1438	83.8
	metB-2	WT-3	O24	23.0898	84.1
	rrsA	H2O-1	P1	30.5302	81
	rrsA	H2O-1	P2	30.4587	80.2
	rrsA	H2O-1	P3	37.1218	75.9
	metA-1	H2O-1	P4	30.7043	81
	metA-1	H2O-1	P5	Undetermined	66.9
	metA-1	H2O-1	P6	Undetermined	61.9
	metA-2	H2O-1	P7	31.12	81.5
	metA-2	H2O-1	P8	Undetermined	85.9
	metA-2	H2O-1	P9	Undetermined	90.8
	metB-1	H2O-1	P10	31.3936	84.7
	metB-1	H2O-1	P11	31.7379	84.5
	metB-1	H2O-1	P12	30.4319	84.5
	metB-2	H2O-1	P13	Undetermined	70.5
	metB-2	H2O-1	P14	30.6205	84.1
	metB-2	H2O-1	P15	36.4908	87.2
		empty	P16	33.6281	75.2
		empty	P17	30.3822	87.4
		empty	P18	30.4136	64.7
		empty	P19	38.9863	72.3
		empty	P20	31.4396	72.3
		empty	P21	28.9388	86.3
		empty	P22	28.5392	90.2
		empty	P23	35.8528	68.6
		empty	P24	29.7529	87.9
