# Supplementary material for: Underground isoleucine biosynthesis pathways in E. coli
Source: eLife. 2020 Aug 24;9:e54207. doi: 10.7554/eLife.54207 (PMC7476758; doi:10.7554/eLife.54207)
Supplement: Figure 7—source data 1. [file elife-54207-fig7-data1.xlsx]

## Sheet: Fig. 7 - SD 1
Relative concentration of cysteine (Cys) and homocysteine (HomCys) as measured by GC-MS in 3 strains: WT, Δ5, and Δ5 cysE*, fed with glucose (glc) and in some cases supplemented with isoleucine (ile).
	Strain	Conditions	Cys			D5 cys* vs. WT	Standard Error	P-value, rank sum test (calculated by matlab)
	WT	glc	532896		Cys	0.564578	0.0697313	0.018589
	WT	glc	1.84458e+06
	WT	glc	1.11042e+06
	WT	glc	2.13303e+06
	WT	glc+Ile	2.87726e+06			D5 cys* vs. D5 (with Ile)	Standard Error	P-value, rank sum test (calculated by matlab)
	WT	glc+Ile	1.18616e+06		Cys	0.563623	0.0696133	0.163025
	WT	glc+Ile	1.80292e+06
	WT	glc+Ile	918542
	∆5	glc+Ile	629373
	∆5	glc+Ile	2.51407e+06
	∆5	glc+Ile	1.56838e+06
	∆5	glc+Ile	1.50158e+06
	∆5 cysE*	glc	861262
	∆5 cysE*	glc	703437
	∆5 cysE*	glc	654836
	∆5 cysE*	glc	1.38079e+06
	∆5 cysE*	glc+Ile	N/D
	∆5 cysE*	glc+Ile	796311
	∆5 cysE*	glc+Ile	1.78741e+06
	∆5 cysE*	glc+Ile	900937
	∆5 cysE* (2)	glc	233055
	∆5 cysE* (2)	glc	469299
	∆5 cysE* (2)	glc+Ile	1.06304e+06
	∆5 cysE* (2)	glc+Ile	848814
	∆5 cysE* (2)	glc+Ile	975029
	∆5 cysE* (2)	glc+Ile	707361
