# Supplementary material for: Underground isoleucine biosynthesis pathways in E. coli
Source: eLife. 2020 Aug 24;9:e54207. doi: 10.7554/eLife.54207 (PMC7476758; doi:10.7554/eLife.54207)
Supplement: Figure 9—source data 1. [file elife-54207-fig9-data1.xlsx]

## Sheet: Fig. 9 - SD 1
Strain			WT		WT + formate		ΔilvA ΔtdcB ΔsdaA ΔsdaB ΔtdcG::kan		∆ilvA ∆tdcB ∆sdaA ∆sdaB ∆tdcG ΔmetA			ΔpflB		ΔtdcE			WT + tdcE		WT + tdcE		∆ilvA ∆tdcB ∆sdaA ∆sdaB ∆tdcG ΔmetA::kan + tdcE
Condition			G + prop	G + prop	G + prop + F	G + prop + F	G + prop + F	G + prop + F	G + prop + F + M	G + prop + F + M		G + prop + A	G + prop + A	G + prop	G + prop		G + prop	G + prop	G + prop + F	G + prop + F	G + prop + F + M	G + prop + F + M		red text here indicates that propionate was labelled
																								G = 10 mM glucose
																								prop = 5 mM propionate
Sample Number			1	2	3	4	5	6	7	8		9	10	11	12		13	14	15	16	17	18		F = 30 mM formate
																								M = 2 mM methionine
Isoleucine																								A = 20 mM acetate
m/z (kg/C)			Relative (%)	Relative (%)	Relative (%)	Relative (%)	Relative (%)	Relative (%)	Relative (%)	Relative (%)		Relative (%)	Relative (%)	Relative (%)	Relative (%)		Relative (%)	Relative (%)	Relative (%)	Relative (%)	Relative (%)	Relative (%)
132.103			100	100	74.75	73.08	29.25	30	11.06	11.46		86.92	100	73.85	71.03		41.82	40.61	13.79	14.46	6.36	6.64
133.106			43.49	44.29	100	100	100	100	100	100		4.36	4.9	30.67	30.15		66.64	65.73	100	100	100	100
134.109			1.65	0.24	4.31	4.49	4.42	4.44	4.73	4.6		0.1	0.16	1.09	1.22		2.87	2.66	4.49	4.78	4.9	4.62
135.113			0.18	0.14	0.26	0.26	0.31	0.24	0.28	0.26		0.21	0.19	0.2	0.31		0.16	0.22	0.21	0.31	0.28	0.15
Percentage Labelled Isoleucine
m/z (kg/C)
132.103			0.688137	0.691228	0.416853	0.410954	0.218316	0.223148	0.0952873	0.0985213		0.949012	0.950119	0.697949	0.691559		0.375101	0.371818	0.116381	0.120954	0.0570199	0.0595997
133,1061 (single labelled)			0.299271	0.306145	0.557662	0.562335	0.74638	0.742501	0.861549	0.859697		0.0476035	0.0465558	0.289859	0.293545		0.597722	0.601813	0.843953	0.83647	0.896539	0.897585
134.109			0.0113543	0.00165895	0.0240352	0.0252488	0.03299	0.032967	0.0407513	0.0395461		0.00109182	0.00152019	0.0103015	0.0118781		0.0257422	0.0243545	0.0378935	0.0399833	0.0439304	0.0414684
135.113			0.00123865	0.00096772	0.00144992	0.00146207	0.00231378	0.001782	0.00241234	0.00223521		0.00229283	0.00180523	0.00189018	0.00301821		0.00143511	0.00201428	0.0017723	0.00259306	0.00251031	0.00134638
			1	2	3	4	5	6	7	8		9	10	11	12		13	14	15	16	17	18
Threonine
m/z (kg/C)			Relative (%)	Relative (%)	Relative (%)	Relative (%)	Relative (%)	Relative (%)	Relative (%)	Relative (%)		Relative (%)	Relative (%)	Relative (%)	Relative (%)		Relative (%)	Relative (%)	Relative (%)	Relative (%)	Relative (%)	Relative (%)
120.066			100	100	100	100	100	100	100	100		100	100	100	100		100	100	100	100	100	100
121.069			3.32	3.37	3.39	2.9	2.93	3.05	2.81	2.96		2.97	2.87	2.99	3.37		2.93	2.86	3.17	3.14	2.99	3.53
122.072			0.4	0.42	0.55	0.41	0.45	0.42	0.36	0.51		0.38	0.39	0.45	0.37		0.2	0.46	0.35	0.31	0.44	0.37
123.076			0.16	0.19	0.23	0.14	0.33	0.23	0.93	0.29		0.19	0.25	0.37	0.23		0.43	0.27	0.23	0.37	0.26	0.48
Percentage Labelled Threonine
m/z (kg/C)
120.066			0.962649	0.961723	0.959969	0.966651	0.964227	0.96432	0.960615	0.963763		0.96581	0.96609	0.963298	0.961816		0.965624	0.965344	0.963855	0.963206	0.964413	0.958038
121.069			0.03196	0.0324101	0.032543	0.0280329	0.0282519	0.0294118	0.0269933	0.0285274		0.0286846	0.0277268	0.0288026	0.0324132		0.0282928	0.0276088	0.0305542	0.0302447	0.028836	0.0338187
122.072			0.0038506	0.00403924	0.00527983	0.00396327	0.00433902	0.00405014	0.00345821	0.00491519		0.00367008	0.00376775	0.00433484	0.00355872		0.00193125	0.00444058	0.00337349	0.00298594	0.00424342	0.00354474
123.076			0.00154024	0.00182727	0.00220793	0.00135331	0.00318195	0.00221794	0.00893372	0.00279491		0.00183504	0.00241523	0.0035642	0.00221218		0.00415218	0.00260643	0.00221687	0.00356386	0.00250747	0.00459858
			1	2	3	4	5	6	7	8		9	10	11	12		13	14	15	16	17	18
Alanine
m/z (kg/C)			Relative (%)	Relative (%)	Relative (%)	Relative (%)	Relative (%)	Relative (%)	Relative (%)	Relative (%)		Relative (%)	Relative (%)	Relative (%)	Relative (%)		Relative (%)	Relative (%)	Relative (%)	Relative (%)	Relative (%)	Relative (%)
90.055			100	100	100	100	100	100	100	100		100	100	100	100		100	100	100	100	100	100
91.0584			2.61	2.61	2.77	2.73	2.4	2.57	2.73	2.43		5.75	5.14	4.44	3.49		5.41	5.21	2.52	2.68	2.52	2.09
92.065			0.28	0.29	0.34	0.31	0.33	0.32	0.31	0.42		0.5	0.4	0.31	0.25		0.37	0.47	0.24	0.23	0.28	0.36
93.0651			0	0	0.13	0.09	0.11	0	0.16	0.13		0.47	0.34	0.41	0.47		0.52	0.58	0.13	0.14	0	0.15
Percentage Labelled Alanine
m/z (kg/C)
90.055			0.971912	0.971817	0.968617	0.96965	0.972384	0.971912	0.968992	0.971062		0.937031	0.944465	0.950932	0.959601		0.940734	0.941088	0.971912	0.970403	0.972763	0.974659
91.0584			0.0253669	0.0253644	0.0268307	0.0264714	0.0233372	0.0249781	0.0264535	0.0235968		0.0538793	0.0485455	0.0422214	0.0334901		0.0508937	0.0490307	0.0244922	0.0260068	0.0245136	0.0203704
92.065			0.00272135	0.00281827	0.0032933	0.00300591	0.00320887	0.00311012	0.00300388	0.00407846		0.00468516	0.00377786	0.00294789	0.002399		0.00348071	0.00442311	0.00233259	0.00223193	0.00272374	0.00350877
93.0651			0	0	0.0012592	0.000872685	0.00106962	0	0.00155039	0.00126238		0.00440405	0.00321118	0.00389882	0.00451012		0.00489182	0.00545831	0.00126349	0.00135856	0	0.00146199
