# Supplementary material for: Underground isoleucine biosynthesis pathways in E. coli
Source: eLife. 2020 Aug 24;9:e54207. doi: 10.7554/eLife.54207 (PMC7476758; doi:10.7554/eLife.54207)
Supplement: Supplementary file 1. [file elife-54207-supp1.xlsx]

## Sheet: Sup Table 1
Supplementary Table 1. Summary of identified mutations in 16 strains lacking threonine deaminases (∆ilvA ∆tdcB) or threonine and serine deaminases (∆ilvA ∆tdcB ∆sdaA ∆sdaB ∆tdcG) that were evolved to grow on 10 mM glucose after 70 hours without isoleucine or 2KB. Shown are mutations with frequency >70% as identified by breseq pipeline. 11 out of 16 strains showed mutations in the metC region eith…
Mutations identified with higher than 70% frequency in ∆ilvA ∆tdcB strain isolated from the growth experiments culture
position	mutation	annotation	gene	description	D2E1C1	D2E2C1	D2E3C1	D2E3C2	D2E4C1	D2E4C2	D2E4C3	D2E5C1	D2E5C2
676674	IS5 (+) +4 bp	intergenic (‑127/‑34)	ybeQ ← / → ybeR	Sel1 family TPR‑like repeat protein/uncharacterized protein	1
2896403	G→A	L51L (CTG→TTG)	ygcR	putative flavoprotein		1				1	1
3131339	large chromosomal deletion	IS5‑mediated	28 genes: [yghQ], yghR, yghS, yghT, pitB, gss, yghU, hybG, hybF, hybE, hybD, hybC, hybB, hybA, hybO, yghW, yghX, yghX, gpr, yqhA, yghA, exbD, exbB, metC, yghB, yqhC, yqhD, [dkgA]			1				1	1
3131339	large chromosomal deletion	IS5‑mediated	29 genes: [yghQ], yghR, yghS, yghT, pitB, gss, yghU, hybG, hybF, hybE, hybD, hybC, hybB, hybA, hybO, yghW, yghX, yghX, gpr, yqhA, yghA, exbD, exbB, metC, yghB, yqhC, yqhD, dkgA, [yqhG]					1
3152996	G→T	G255C (GGC→TGC)	metC	cystathionine beta‑lyase, PLP‑dependent	1
3153348	G→A	R372H (CGC→CAC)	metC	cystathionine beta‑lyase, PLP‑dependent					1
3782465	C→T	A33T (GCG→ACG)	cysE	serine acetyltransferase									1
4022338	T→C	I686T (ATC→ACC)	metE	5‑methyltetrahydropteroyltriglutamate‑ homocysteine S‑methyltransferase								0.74
Mutations identified with higher than 70% frequency in ∆5 strain isolated from the growth experiments culture
position	mutation	annotation	gene	description	D5E1C1	D5E2C1	D5E2C2	D5E3C1	D5E3C2	D5E3C3	D5E4C1
3131339	large chromosomal deletion	IS5‑mediated	25 genes: [yghQ], yghR, yghS, yghT, pitB, gss, yghU, hybG, hybF, hybE, hybD, hybC, hybB, hybA, hybO, yghW, yghX, yghX, gpr, yqhA, yghA, exbD, exbB, metC, [yghB]			1	1
3152318	C→G	Q29E (CAG→GAG)	metC	cystathionine beta‑lyase, PLP‑dependent				1	1
3152855	G→A	A208T (GCC→ACC)	metC	cystathionine beta‑lyase, PLP‑dependent	1
4021687	T→A	I469N (ATT→AAT)	metE	5‑methyltetrahydropteroyltriglutamate‑ homocysteine S‑methyltransferase							0.73
DxEyCz corresponds to a given genome sequencing event describing a strain with x base deletions (either 2 or 5) in evolution experiment y (5 separate experiments) and isolated colony z (different colonies isolated from a given growing culture).
