# Supplementary material for: Underground isoleucine biosynthesis pathways in E. coli
Source: eLife. 2020 Aug 24;9:e54207. doi: 10.7554/eLife.54207 (PMC7476758; doi:10.7554/eLife.54207)
Supplement: Supplementary file 2. [file elife-54207-supp2.xlsx]

## Sheet: Sup Table 2
Supplementary Table 2. List of all primers used in this study
#	Name	Sequence	Description
1	ilvA_KO_F	ATAAGCGAAGCGCTATCAGGCATTTTTCCCTAACCCGCCAAAAAGAACCTAATTAACCCTCACTAAAGGGCG	Forward primer for generating ilvA knockout cassette
2	ilvA_KO_R	GCCGACAAAGGCGCGGTGCGCGATAAATCGAAACTGGGGGGTTAATAATGTAATACGACTCACTATAGGGCTC	Reverse primer for generating ilvA knockout cassette
3	ilvA_KO_V_F	CTGGTGGCACCTCTGGTCTTTC	Forward primer for verifying ilvA knockout cassette
4	ilvA_KO_V_R	GAGAAAACGCCGTTTGAGCTGG	Reverse primer for verifying ilvA knockout cassette
5	tdcB_KO_F	GTACTCATATCCTATCCTCAACGAATTAATTAAGCGTCAACGAAACCGGTAATTAACCCTCACTAAAGGGCG	Forward primer for generating tdcB knockout cassette
6	tdcB_KO_R	TCGGTTACGGTTACCTACATATTTAATTCAGGCGAAGAGGTTTTATAATGTAATACGACTCACTATAGGGCTC	Reverse primer for generating tdcB knockout cassette
7	tdcB_KO_V_R	AGCAGCATCGGTTTTGGTGGAA	Forward primer for verifying tdcB knockout cassette
8	tdcB_KO_V_F	CGATTGCCGTACCAAACAAGCC	Reverse primer for verifying tdcB knockout cassette
9	tdcG_KO_F	GCACCCAAGGATGAAAGCTGACAGCAATGTCAGCCGCAGACCACTTTAATAATTAACCCTCACTAAAGGGCG	Forward primer for generating tdcG knockout cassette
10	tdcG_KO_R	AGGTCGTTCCGCTCCACTTCACTGAACGGCAATCCGAGGGTGTGGATATGTAATACGACTCACTATAGGGCTC	Reverse primer for generating tdcG knockout cassette
11	tdcG_KO_V_R	CGTGTTTATCACCGATCTGAATGATTTTGCCAC	Forward primer for verifying tdcG knockout cassette
12	tdcG_KO_V_F	CTTATTATTTTTTTCCGAGCCGCATCAAGGCGATATG	Reverse primer for verifying tdcG knockout cassette
13	sdaA_KO_F	TATTAGTTCGTTACTGGAAGTCCAGTCACCTTGTCAGGAGTATTATCGTGAATTAACCCTCACTAAAGGGCG	Forward primer for generating sdaA knockout cassette
14	sdaA_KO_R	ATCCGTTGCAGATGGGCGAGTAAGAAGTATTAGTCACACTGGACTTTGATTAATACGACTCACTATAGGGCTC	Reverse primer for generating sdaA knockout cassette
15	sdaA_KO_V_R	CCTGACGCAACAGTGGAAGTGT	Forward primer for verifying sdaA knockout cassette
16	sdaA_KO_V_F	GGCGCTGCAAATTGGTGTGAAA	Reverse primer for verifying sdaA knockout cassette
17	sdaB_KO_F	GCCGCTTTCGGGCGGCGCTTCCTCCGTTTTAACGCGATGTATTTCCTATGAATTAACCCTCACTAAAGGGCG	Forward primer for generating sdaB knockout cassette
18	sdaB_KO_R	CCTCGCAAAACGAGGCCTTTGGAGAGCGATTAATCGCAGGCAACGATCTTTAATACGACTCACTATAGGGCTC	Reverse primer for generating sdaB knockout cassette
19	sdaB_KO_V_R	ATGAACAGCCACGATAACCCCC	Forward primer for verifying sdaB knockout cassette
20	sdaB_KO_V_F	GGGTCTGATTGCAATCTCCGCA	Reverse primer for verifying sdaB knockout cassette
21	metC_KO_F	TTCATGCTAGTTTAGACATCCAGACGTATAAAAACAGGAATCCCGACATGAATTAACCCTCACTAAAGGGCG	Forward primer for generating metC knockout cassette
22	metC_KO_R	GTCTGCAAAATTGTCCAAAAGTGGCAATGTTATACAATTCGCGCAAAACCTAATACGACTCACTATAGGGCTC	Reverse primer for generating metC knockout cassette
23	metC_KO_V_F	TGCATACTGCCGTACCTTTGCT	Forward primer for verifying metC knockout cassette
24	metC_KO_V_R	TGGACTTTCCTGTGGAACAGCG	Reverse primer for verifying metC knockout cassette
25	metB_KO_F	CTCTGGTGCCTGACATTTCACCGACAAAGCCCAGGGAACTTCATCACATGATTAACCCTCACTAAAGGGCG	Forward primer for generating metB knockout cassette
26	metB_KO_R	CGCCCCTGCCTGCGCAATCACACTCATTTTTACCCCTTGTTTGCAGCCCGTAATACGACTCACTATAGGGCTC	Reverse primer for generating metB knockout cassette
27	metB_V_F	GTGGGTACTGACCGTAAACCCG	Forward primer for verifying metB knockout cassette
28	metB_V_R	CCAGTTAATCAACTGGTTAGTGGTGC	Reverse primer for verifying metB knockout cassette
29	metA_KO_F	ATCTGGATGTCTAAACGTATAAGCGTATGTAGTGAGGTAATCAGGTTATGAATTAACCCTCACTAAAGGGCG	Forward primer for generating metA knockout cassette
30	metA_KO _RC	ATCGCTTAACGATCGACTATCACAGAAGATTAATCCAGCGTTGGATTCATTAATACGACTCACTATAGGGCTC	Reverse primer for generating metA knockout cassette
31	metA_V_F	CGACACCAAATCGCAACGAGTTC	Forward primer for verifying metA knockout cassette
32	metA_V_R	CGTTCAGCACAACTAAGACTACTC	Reverse primer for verifying metA knockout cassette
33	tdcE_KO_F	CGATAATCTTTTTCATACATCCTCCGGCGTCAGAGCGCCTGGGTAAAGGT AATTAACCCTCACTAAAGGGCG	Forward primer for generating tdcE knockout cassette
34	tdcE _KO_R	GCAGAATTTGCATAATTTAGTTGAAGTATTGTAGAGAGATTATTTTTCAT TAATACGACTCACTATAGGGCTC	Reverse primer for generating tdcE knockout cassette
35	tdcE _V_F	GGCAGCAACCACGATCGCTTTG	Forward primer for verifying tdcE knockout cassette
36	tdcE _V_R	CGCTCTAACTCCTGTGGTGAGCG	Reverse primer for verifying tdcE knockout cassette
37	pflB_KO_F	TTTTACTGTACGATTTCAGTCAAATCTAATTACATAGATTGAGTGAAGGTAATTAACCCTCACTAAAGGGCG	Forward primer for generating pflB knockout cassette
38	pflB_KO_R	CGAAGTACGCAGTAAATAAAAAATCCACTTAAGAAGGTAGGTGTTACATGTAATACGACTCACTATAGGGCTC	Reverse primer for generating pflB knockout cassette
39	pflB_KO_V_F	ATCGGTGGTGGTTTGTTGGT	Forward primer for verifying pflB knockout cassette
40	pflB_KO_V_R	ACGTCGAGTCTGTTTTGGCA	Reverse primer for verifying pflB knockout cassette
41	CysE_A33T_MAGE	G*T*GCTTGAGTAGCGTCGtGTGGTAAAAACTGGCCAGCATTGGCTCACAGTCCGCCAGCGTTCTGGCTTCGGCTTTAATATTGTTCCAG*A*C	Primer for introducing coding mutation (small t) in CysE gene by MAGE. Asterisks indicate phosphothiorylated bonds.
42	CysE_MAGE_VF	GTCGTGTGAAGAACTGGAAATTGTC	Forward primer for MAGE modification verification
43	CysE_MAGE_VR	CCCAACTTCAATATTGCCGAGG	Reverse primer for MAGE modification verification
44	tdcE_seq1	GTAGACAGCATTGCCTGCGACCTG	Sequencing primer to ensure tdcE cloning integrity 1
45	tdcE_seq2	GTCACCTCTTCCTTGCAGTATGAAAATGAC	Sequencing primer to ensure tdcE cloning integrity 2
46	tdcE_seq3	GTTATCTGGTACGTGAACGCGAACTG	Sequencing primer to ensure tdcE cloning integrity 3
47	tdcE_HIS_A	CAATGCATCATCACCATCACCACAAGGTAGATATTGATACCAGCGATAAGCTGTACG	Forward primer for cloning tdcE from E. coli genome and adding His-tag and restriction sites for use in cloning system
48	tdcE_CAP_D	CTCTTACGTGCCCGATCAACGCTAGCTCAGAGCGCCTGGGTAAAGGTACGTG	Reverse primer for cloning tdcE from E. coli genome and adding restriction sites for use in cloning system
49	tdcE_C	GCGCTAACCCGATGCACGGTCGTG	Primer used in conjunction with primer “tdcE_CAP_D” to PCR a fragment of tdcE and remove endogenous incompatible restriction site
50	tdcE_B	CACGACCGTGCATCGGGTTAGCGC	Primer used in conjunction with primer “tdcE_HIS_A” to PCR a fragment of tdcE and remove endogenous incompatible restriction site
51	CysE_A33T_fw	GGCCAGTTTTTACCACACCACGCTACTCAAGCACG	Forward primer for introducing a point mutation in CysE from the ASKA collection
52	CysE_A33T_rv	CGTGCTTGAGTAGCGTGGTGTGGTAAAAACTGGCC	Reverse primer for introducing a point mutation in CysE from the ASKA collection
53	rrsA-F	CTCTTGCCATCGGATGTGCCCA	qPCR of rrsA (reference gene)
54	rrsA-R	CCAGTGTGGCTGGTCATCCTCTCA	qPCR of rrsA (reference gene)
55	metA-1-F	TCCTAAGCAAACTCGCACC	qPCR of metA with primer pair 1
56	metA-1-R	ATCACGAATCAACGCTGCC	qPCR of metA with primer pair 1
57	metA-2-F	GCCTGCTTTCAAACTCACC	qPCR of metA with primer pair 2
58	metA-2-R	GCGACATCATTAAACTCCACC	qPCR of metA with primer pair 2
59	metB-1-F	TAATCTCTCACGCCGCAAC	qPCR of metB with primer pair 1
60	metB-1-R	AATCTTCGCCATCTTCAATACC	qPCR of metB with primer pair 1
61	metB-2-F	AATACCTGCAAACCCAGCC	qPCR of metB with primer pair 2
62	metB-2-R	CCACTCCCCCTAATGATTCC	qPCR of metB with primer pair 2
